1 **Lessons from mainland China's epidemic experience about the growth rules of**  
2 **infected and recovered cases of COVID-19 worldwide**

3

4 Chuanliang Han<sup>1△</sup>, Yimeng Liu<sup>2,3,4△</sup>, Jiting Tang<sup>2,3,4</sup>, Yuyao Zhu<sup>2,3,4</sup>, Carlo Jaeger<sup>4,5</sup>,  
5 and Saini Yang<sup>2,3,4\*</sup>

6 <sup>1</sup>State Key Laboratory of Cognitive Neuroscience and Learning & IDG/McGovern  
7 Institute for Brain Research, Beijing Normal University, Beijing 100875, China

8 <sup>2</sup>Key Laboratory of Environmental Change and Natural Disaster, Ministry of  
9 Education, Beijing Normal University, Beijing 100875, China

10 <sup>3</sup>State Key Laboratory of Earth Surface Processes and Resource Ecology, Beijing  
11 Normal University, Beijing 100875, China

12 <sup>4</sup>Academy of Disaster Reduction and Emergency Management, Ministry of  
13 Emergency Management and Ministry of Education, Faculty of Geographical Science,  
14 Beijing Normal University, Beijing 100875, China

15 <sup>5</sup>Global Climate Forum, Neue Promenade 6, 10178 Berlin, Germany.

16 <sup>△</sup>C.L.H and Y.M.L contributed equally to this work

17

18 **\*Corresponding author:**

19 Saini Yang,

20 Key Laboratory of Environmental Change and Natural Disaster, Ministry of  
21 Education & State Key Laboratory of Earth Surface Processes and Resource Ecology  
22 & Academy of Disaster Reduction and Emergency Management Ministry of  
23 Emergency Management and Ministry of Education, Faculty of Geographical Science,  
24 Beijing Normal University, Beijing 100875, China

25 Email: yangsaini@bnu.edu.cn

26 **Conflict of interest:** The authors declare no competing conflicts of interest.

27 **Acknowledgements:** This study was sponsored by the National Key Research and  
28 Development Program of China (2018YFC1508903), the National Natural Science  
29 Foundation of China (41621061) and the support of International Center for

30 **Collaborative Research on Disaster Risk Reduction (ICCR-DRR)**  
NOTE: This preprint reports new research that has not been certified by peer review and should not be used to guide clinical practice.

31

32 **Abstract**

33 The novel coronavirus disease (COVID-19) that emerged at the end of 2019 has been  
34 controlled in mainland China so far, while it is still spreading globally. When the  
35 pandemic will end is a question of great concern. A logistic model depicting the  
36 growth rules of infected and recovered cases in mainland China may shed some light  
37 on this question. We extended this model to 31 countries outside China experiencing  
38 serious COVID-2019 outbreaks. The model well explained the data in our study ( $R^2 \geq$   
39 0.95). For infected cases, the semi-saturation period (SSP) ranges from 63 to 170 days  
40 (March 3 to June 18). The logistic growth rate of infected cases is positively  
41 correlated with that of recovered cases, and the same holds for the SSP. According to  
42 the linear connection between the growth rules for infected and recovered cases  
43 identified from the Chinese data, we predicted that the SSP of the recovered cases  
44 outside China ranges from 82 to 196 days (March 22 to July 8). More importantly, we  
45 found a strong positive correlation between the SSP of infected cases and the timing  
46 of government's response, providing strong evidence for the effectiveness of rapid  
47 epidemic control measures in various countries.

48

49

## 50 **1.Introduction**

51 In December 2019, a series of cases with unknown cause of pneumonia was reported  
52 in Wuhan, the capital of Hubei Province in mainland China ([WHO<sub>a</sub>](#)). Later,  
53 deep-sequencing analysis of lower respiratory samples confirmed the presence of a  
54 novel coronavirus, which was firstly named as 2019 novel coronavirus (2019-nCoV)  
55 on Jan 12, 2020 and may have originated from certain bats ([Zhou et al., 2020](#)). The  
56 coronavirus (SARS-CoV-2) was officially renamed as COVID-19 on February 12,  
57 2020. Human-to-human transmission through of COVID-19 has been confirmed not  
58 only in China ([Wang et al., 2020](#); [Li et al., 2020](#); [Zhu et al., 2020](#); [Hui et al., 2020](#)),  
59 but in countries around the world such as the Republic of Korea ([Choi et al., 2020](#); [Ki  
60 et al., 2020](#); [Shim et al., 2020](#)), Italy ([Livingston et al., 2020](#); [Spina et al., 2020](#);  
61 [Rosenbaum, 2020](#)) and Iran ([Tuite et al., 2020](#); [Abdi, 2020](#); [Zhuang et al., 2020](#)). At  
62 the time of writing, the epidemic situation in mainland China has been effectively  
63 controlled since there are only sparse daily local new cases since Mar 19, 2020, and  
64 the recovery rate in mainland China has risen up to 93.51% by April 13 ([Chinese  
65 Center for Disease Control and Prevention, CCDC](#)). However, the epidemic situation  
66 outside China is worsening. As of April 13, 2020, globally, a total of 1788665  
67 confirmed cases of COVID-19, and death and recovered rates of 6.35% and 20.45 %,  
68 respectively, have been reported ([Sina.com](#)). When the inflection point will appear for  
69 both infection and cure outside China remains unclear. The hope and lessons on  
70 COVID-19 control from China is necessary and worth quantifying ([Azman &  
71 Luquero, 2020](#)).

72

73 We applied a descriptive model that has been proven to be robust and stable ([Han et  
74 al., 2020](#)) to analyze the global data on COVID-19 cases globally (infected and  
75 recovered cases in mainland China, and infected cases countries outside China). We  
76 then estimated the relation between parameters of infected and recovered cases in  
77 mainland China. Next, we used that relationship to map the parameter space of

78 infected case to the parameter space of recovered cases for 31 countries globally.

79 Finally, we explored the relationship between the model parameters and governmental  
80 control measures.

81

## 82 **2. Method**

### 83 **2.1 Sources of Data:**

84 The cumulative number of confirmed and recovered COVID-19 cases in mainland  
85 China was obtained from the National Health Commission of China, and the  
86 Provincial Health Commissions of 30 provincial administrative regions (excluding  
87 Tibet, because the only one confirmed infected COVID-19 case in Tibet has  
88 recovered on Feb. 12) in mainland China (January 10 to March 19, 2020). The data  
89 are publically available. All cases were laboratory confirmed following the published  
90 standards made by the National Health Commission of China (CCDC<sub>a</sub>). The basic test  
91 procedure has been described in detail in previous work (Zhou et al., 2020; Huang et  
92 al., 2020). This dataset was partially analyzed in an initial work on this topic (Han et  
93 al., 2020).

94

95 For our analyses we selected 31 countries outside China with serious coronavirus  
96 epidemic situations (January 10 to April 13, 2020). Their population amounts to 39.4%  
97 of the world's population (57.8% with China included) and 81.6% of the world's  
98 infected COVID-19 cases (86.2% with China included) (WHO<sub>a</sub>). The data of  
99 COVID-19 cases in countries outside China were obtained from the situation reports  
100 on the official website of the World Health Organization (WHO<sub>a</sub>), which is publicly  
101 available. The data used in this study include the cumulative number of reported  
102 laboratory-confirmed COVID-19 cases. Countries included in our study are: Republic  
103 of Korea, Japan, Australia, and Singapore, all in the Western Pacific Region; Italy,  
104 Spain, France, Germany, Switzerland, the United Kingdom, Netherlands, Sweden,  
105 Denmark, Austria, Belgium, Portugal, Czech Republic, Finland, Ukraine, Slovakia,

106 Bulgaria, Lithuania, in Europe; India in South-East Asia; the Islamic Republic of Iran,  
107 Lebanon, in the Eastern Mediterranean Region; the United States of America, Canada,  
108 Brazil, Mexico, in the Americas; South Africa, Ethiopia, in Africa. All the  
109 laboratory-confirmed cases are determined according to the WHO standard.  
110 The overnments of these countries all declared a state of national emergency, of  
111 wartime, or a blockade of their borders as a result of the COVID-19 outbreak. In this  
112 study, we collected the beginning of government intervention from the mainstream  
113 authoritative media of each country selected.

114

## 115 **2.2 Epidemic curve modeling**

116 In this work, we used a sigmoid descriptive model (Equation (1)), as derived from  
117 logistic differential equations ([Han et al., 2020](#)).

$$118 \quad N(t) = \frac{A}{1+e^{-k(t-t_0)}} \quad (1)$$

119  $N(t)$  is the general form of the cumulative numbers of infected or recovered patients at  
120 time  $t$ .  $A$  denotes the maximum number of infections or recoveries,  $k$  is the logistic  
121 growth rate,  $t_0$  is the inflection point of the sigmoid curve. This descriptive model has  
122 been verified by not only with the infected, death and recovered cases of COVID-19,  
123 but also with the data of SARS in 2003 ([Han et al., 2020](#)). For the infected cases,  
124 there are three parameters ( $A, k, t_0$ ) in the model; for the recovered cases, we fixed  $A$   
125 to the difference between the maximum number of cumulative infections and deaths,  
126 based on biological fact. It is worth mentioning that in our model,  $t_0$  is the  
127 mathematically defined inflection point. In this paper, we assumed that  $t_0$  is the time  
128 of inflection of the epidemic dynamics in a region.

129

130 We processed the data and modeled them with custom scripts on MATLAB (the Math  
131 Works). We adopted the nonlinear least square (NLS) algorithm for data fitting and  
132 parameter estimation.

133

### 134 3. Results

135 Based on the cumulative number of confirmed and recovered cases in 30 provinces of  
136 mainland China as well as in 31 countries, with the above-mentioned model all data  
137 could be well explained ( $R^2 > 0.95$ ) (See Methods, [Fig. 1A-C](#), [Fig. 4A-C](#)).

138

#### 139 3.1 Relationship between infected and recovered cases in mainland China

140 The epidemic situation of COVID-19 has been controlled in China ([CCDC<sub>b</sub>](#)), with a  
141 recovery rate of 93.51% ([CCDC<sub>a</sub>](#)). The time series of infected and recovered cases  
142 and their fitted curves for the three example provinces (Anhui, Heilongjiang, Hebei)  
143 are shown in [Fig. 1A-C](#). By observing the fitted curves of all provinces in mainland  
144 China (Supplementary Figure S1), we found that the logistic growth rate ( $k$ ) of  
145 infected cases is larger than that of recovered cases, and that the semi-saturation  
146 period ( $t_0$ ) of infected cases is shorter than that of recovered cases.

147

148 As shown in Figure 2, the parameter spaces of  $k$  and  $t_0$  are different for infected (red  
149 circle) and recovered cases (blue circle), and there is a significant negative correlation  
150 between the two (for infected cases,  $r = -0.46$ ,  $p = 0.0103$ ; for recovered cases,  $r = -0.56$ ,  
151  $p = 0.0012$ ; Pearson correlation). When we compared these two parameters of infected  
152 and recovered cases, we found that infection cases have larger ( $t = 6.9136$ ,  $p < 10^{-7}$ ,  
153 right-tailed test) growth rates ([Fig. 2B](#)) but smaller ( $t = -37.271$ ,  $p < 10^{-25}$ , left-tailed test)  
154 semi-saturation periods ([Fig. 2C](#)) than recovered cases. The growth rates of infected  
155 and recovered cases is significantly positively correlated ( $r = 0.38$ ,  $p = 0.0359$ , Pearson  
156 Correlation), and so is the semi-saturation period of infected and recovered cases  
157 ( $r = 0.66$ ,  $p = 0.0001$ , Pearson Correlation). Each of them could be fitted to a linear  
158 model, with slope and intercept of 0.36 (CI: [0.0268, 0.698]) and 0.1 (CI: [0.014,  
159 0.191]), respectively (panel B), while those of panel C are 1.06 (CI: [0.59, 1.54]) and  
160 15.36 (CI: [-0.85, 31.56]).

161

### 162 **3.2 Growth rules of COVID-19 infections outside China**

163 The dataset of infected case in mainland China shows the time stability of the logistic  
164 model (Fig. 3). The example of the province of Fujian is shown in Figure 3A. It is  
165 clear that as the in length of the time-series increases, the fitting curves converge to  
166 the actual number of cases (black dots).

167

168 We defined an index for minimum time length (MTL) to measure the amount of data  
169 necessary to produce a stable output. This index is the time length at which the  
170 change of parameter value ( $k$  or  $t_0$ ) is less than 5% in two consecutive days. With the  
171 data of 30 provinces in China, we found that the MTL for the logistic growth rate ( $k$ )  
172 is 15 days (Fig. 3B) and for the semi-saturation period ( $t_0$ ) 26 days (Fig. 3C). This  
173 result indicates the amount of data required to measure the epidemic situation.

174

175 After identifying the relationship between the increasing rate and the semi-saturation  
176 period, we applied this relationship to the COVID-19 cases from 31 countries. We  
177 applied the descriptive model to fit the data for cumulative number of infected cases  
178 in each of the 31 countries. Figure 4 shows the time-series data of infection for three  
179 countries (Canada, Germany and Iran, Fig. 4A-C; see the supplementary Figure S2 for  
180 all 31 countries). All data series for infected cases could be well explained by our  
181 model ( $R^2 > 0.95$ ). The average change rates of the parameters are already lower than 5%  
182 (Fig 4 D-F), which indicates that the parameters we estimated from the model are  
183 stable. We noticed that the logistic growth rate of 31-country cases does not have a  
184 significant difference ( $t=1.197, p=0.237$  two-tailed test) with that of Chinese  
185 provinces, but the 31-country cases have a significantly longer ( $t=-17.4819, p < 10^{-20}$ ,  
186 right-tailed test) semi-saturation period. The numbers indicate that the  $t_0$  of infections  
187 in 31 countries has an average of 98 days (std: 20.5), and the average date matched to  
188 this is around April 7 (ranging from Mar 3 to Jun 18).

189

### 190 **3.3 Predictions for the growth rules of recovered COVID-19 cases and their** 191 **relation to the timing of governmental control measures**

192 On observing the logistic growth rate ( $k$ ) and the semi-saturation period ( $t_0$ ) of  
193 infected cases in 31 countries, we found there was a negative correlation ( $r=-0.63$ ,  
194  $p=0.0001$ , Pearson Correlation) (Fig. 5) between these two parameters, which shows a  
195 similar tendency to the results of provinces in mainland China (Fig. 2A). To predict  
196 the logistic growth rate ( $k$ ) and the semi-saturation (i.e. inflection) point ( $t_0$ ) of the  
197 recovered COVID-19 cases outside China, we mapped the parameter space of  
198 infected cases into the parameter space of recovered cases, based on the parameter  
199 relationship between infected cases and recovered cases obtained from China (Fig.  
200 2BC). For the 31 countries, the logistic growth rate ranges from 0.08 to 0.45. The  
201 mean  $t_0$  of the fitted curves for recovered cases is 119.71 (std: 21.73), which means  
202 that the mean semi-saturation period ( $t_0$ ) for these 31 countries will arrive on,  
203 approximately April 29, 2020 (ranging from Mar 22 to July 8).

204  
205 To explore the practical implication of these parameters, we took the timing of  
206 governmental emergency control measures related to COVID-19 as a variable to  
207 analyze its relationship with the key parameters (Fig. 6). We found that the  
208 semi-saturation time showed a significant positive correlation ( $r=0.73$ ,  $p<0.0001$ ,  
209 Spearman correlation) with the timing of governmental control measures (Fig. 6 BE).  
210  $k$  showed a marginally significant negative correlation ( $r=-0.3$ ,  $p=0.0925$ , Spearman  
211 correlation), while the logistic growth rate or the maximum of infected cases do not  
212 show a strong correlation ( $r=0.02$ ,  $p=0.91$ , Spearman correlation) with the timing of  
213 control measures (Fig. 6 ACDF). China released the earliest national control measures  
214 to prevent the spread of COVID-19 (on Jan. 23) and its  $t_0$  is the lowest (Figure 5, red  
215 circle). We also noticed that the timing of governmental emergency control measures  
216 is significantly earlier than the semi-saturation period (Fig. 6B) ( $t=2.99$ ,  $p=0.0043$ ,  
217 two-tailed test), which indicates that most of the selected countries have taken



218 measures in the early phase of the outbreak.

219

220

## 221 **4. Discussion**

222 Based on data for 30 provinces in mainland China from Jan 20 to Mar 29, 2020, we  
223 have showed that the the growth characteristics of infected and recovered cases, are  
224 positively correlated (**Fig. 2 BC**). Further, we explained the data from 31 countries  
225 using the same model (see methods). We predicted the logistic growth rates ( $k$ ) and  
226 semi-saturation times ( $t_0$ ) of recovered cases based on the knowledge of data from  
227 China. It is worth mentioning that there is a strong correlation between these  
228 parameters and the timing of governmental emergency policies on COVID-19.

229

### 230 **4.1 Comparison with previous work**

231 Different from models that have been applied to COVID-19, like SIR or SEIR ([Li et](#)  
232 [al., 2020](#); [Wang et al., 2020](#); [Tian et al., 2020](#)), our model is relatively simple, but  
233 robust. The present investigation is an extension of our previous work ([Han et al.,](#)  
234 [2020](#)). We have verified that our model explains the data in various geographic spaces  
235 of mainland China well, and we have provided robust results with different lengths of  
236 time series.

237

238 This model is able to capture the macroscopic dynamics of the epidemics worldwide  
239 ( $R^2 > 0.95$ ) (**Fig. 4**), and we quantitatively investigated the minimum data length to  
240 produce a stable output (**Fig. 3**). By now, the number of domestic infected cases in  
241 China is very limited, which is consistent with our prediction results. The cumulative  
242 numbers of infected and recovered cases are almost saturated. This means that the  
243 spread of the virus has been effectively controlled. Thus we believe that the parameters  
244 estimated in this work for Chinese provinces are reliable (**Fig. 1A-C**). The  
245 characteristics of two curves can depict the dynamic macroscopic features of the  
246 epidemic situation.

247

248 Moreover, we extended this model to the data in each of 31 countries (**Fig 4 A-C**), and

249 found that the sigmoid model fits the data very well, too ( $R^2 > 0.95$ ) (Fig 4 A-C).

250

## 251 **4.2 Relationship among model parameters and the prediction of the recovered** 252 **cases**

253 We noticed that the semi-saturation period of infected and recovered cases in China  
254 showed a positive correlation ( $p$ -value = 0.0001). This phenomenon corresponds to  
255 common sense, since recovery is always later than infection. Although the positive  
256 correlation between the logistic growth rates of infected and recovered cases is  
257 significant ( $p$ -value = 0.0359), the correlation is much lower than that of  
258 semi-saturation times. This result is reasonable, too, since the causes determining the  
259 logistic growth rates of infected cases are quite different from those of recovered  
260 cases.

261 When comparing  $k$  and  $t_0$  in specific cases, no matter whether in mainland China or  
262 countries worldwide (Fig. 5), we found significant negative correlations. This is  
263 consistent with our initial work (Han et al., 2020). As for the negative correlation  
264 between  $k$  and  $t_0$  for recovered cases, it might also be as the case that when the logistic  
265 growth rate ( $k$ ) of the recovered cases is larger, it will take less time to cure most  
266 patients.

267

## 268 **4.3 Suggestion for governments around the world on the prevention and control** 269 **of COVID-19**

270 Most importantly, we found there is a strong correlation between the timing of  
271 governmental control measures for COVID-19 in 31 countries and the semi-saturation  
272 period estimated (Fig 6 BE). This indicates that the early implementation of the  
273 government's prevention and control policy effectively shortened the turning point of  
274 the epidemic. Taking China as an example, with regard to the COVID-19 outbreak in  
275 Wuhan the strict isolation policy was announced on Jan. 23, and the inflection point  
276 there was around Feb 9, 2020, so that the time lag was 17 days. Across all countries,

277 the timing of governmental policy is significantly shorter than the semi-saturation  
278 period of infected cases, which is also a strong signal for governments of all countries  
279 to take control measures as early as possible.  
280

## 281 **Reference**

- 282 Sina, [https://news.sina.cn/zt\\_d/yiqing0121](https://news.sina.cn/zt_d/yiqing0121)
- 283 WHO<sub>a</sub>, <https://www.who.int/docs/default-source/coronaviruse/situation-reports>
- 284 CCDC<sub>a</sub> Prevention, C. C. f. D. C. a. Prevention and control measures of COVID-19,  
285 <<http://www.nhc.gov.cn/jkj/s3577/202002/a5d6f7b8c48c451c87dba14889b30147/file>  
286 [s/3514cb996ae24e2faf65953b4ecd0df4.pdf](http://www.nhc.gov.cn/jkj/s3577/202002/a5d6f7b8c48c451c87dba14889b30147/file)> (2020).
- 287 CCDC<sub>b</sub> [http://www.nhc.gov.cn/xcs/yqfkdt/gzbd\\_index.shtml](http://www.nhc.gov.cn/xcs/yqfkdt/gzbd_index.shtml)
- 288 Li R, Pei S, Chen B, Song Y, Zhang T, Yang W, Shaman J (2020) Substantial  
289 undocumented infection facilitates the rapid dissemination of novel coronavirus  
290 (SARS-CoV2). *Science*.
- 291 Zhou P et al. (2020) A pneumonia outbreak associated with a new coronavirus of  
292 probable bat origin. *Nature*.
- 293 Wang D, Hu B, Hu C, Zhu F, Liu X, Zhang J, Wang B, Xiang H, Cheng Z, Xiong Y,  
294 Zhao Y, Li Y, Wang X, Peng Z (2020) Clinical Characteristics of 138 Hospitalized  
295 Patients With 2019 Novel Coronavirus-Infected Pneumonia in Wuhan, China. *JAMA*.
- 296 Li Q et al. (2020) Early Transmission Dynamics in Wuhan, China, of Novel  
297 Coronavirus-Infected Pneumonia. *N Engl J Med*.
- 298 Zhu N, Zhang D, Wang W, Li X, Yang B, Song J, Zhao X, Huang B, Shi W, Lu R,  
299 Niu P, Zhan F, Ma X, Wang D, Xu W, Wu G, Gao GF, Tan W, China Novel  
300 Coronavirus I, Research T (2020) A Novel Coronavirus from Patients with Pneumonia  
301 in China, 2019. *N Engl J Med*.
- 302 Hui DS, E IA, Madani TA, Ntoumi F, Kock R, Dar O, Ippolito G, McHugh TD,  
303 Memish ZA, Drosten C, Zumla A, Petersen E (2020) The continuing 2019-nCoV  
304 epidemic threat of novel coronaviruses to global health - The latest 2019 novel  
305 coronavirus outbreak in Wuhan, China. *Int J Infect Dis* 91:264-266.
- 306 Choi SC, Ki M (2020) Estimating the reproductive number and the outbreak size of  
307 Novel Coronavirus disease (COVID-19) using mathematical model in Republic of  
308 Korea. *Epidemiol Health*:e2020011.
- 309 Ki M, nCo VT (2020) Epidemiologic characteristics of early cases with 2019 novel  
310 coronavirus (2019-nCoV) disease in Republic of Korea. *Epidemiol Health*:e2020007.
- 311 Shim E, Tariq A, Choi W, Lee Y, Chowell G (2020) Transmission potential and  
312 severity of COVID-19 in South Korea. *Int J Infect Dis*.
- 313 Abdi M (2020) Coronavirus disease 2019 (COVID-19) outbreak in Iran; actions and  
314 problems. *Infect Control Hosp Epidemiol*:1-5.
- 315 Tuite AR, Bogoch, II, Sherbo R, Watts A, Fisman D, Khan K (2020) Estimation of  
316 Coronavirus Disease 2019 (COVID-19) Burden and Potential for International  
317 Dissemination of Infection From Iran. *Ann Intern Med*.
- 318 Zhuang Z, Zhao S, Lin Q, Cao P, Lou Y, Yang L, He D (2020) Preliminary estimation  
319 of the novel coronavirus disease (COVID-19) cases in Iran: A modelling analysis

320 based on overseas cases and air travel data. *Int J Infect Dis*.  
321 Livingston E, Bucher K (2020) Coronavirus Disease 2019 (COVID-19) in Italy.  
322 *JAMA*.  
323 Rosenbaum L (2020) Facing Covid-19 in Italy - Ethics, Logistics, and Therapeutics  
324 on the Epidemic's Front Line. *N Engl J Med*.  
325 Spina S, Marrazzo F, Migliari M, Stucchi R, Sforza A, Fumagalli R (2020) The  
326 response of Milan's Emergency Medical System to the COVID-19 outbreak in Italy.  
327 *Lancet* 395:e49-e50.  
328 Han C, Liu Y, Yang S (2020) Intrinsic growth rules of patients infected, dead and  
329 cured with 2019 novel coronavirus in mainland China.  
330 *medRxiv:2020.2002.2023.20024802*.  
331 Zhou P et al. (2020) A pneumonia outbreak associated with a new coronavirus of  
332 probable bat origin. *Nature*.  
333 Huang C et al. (2020) Clinical features of patients infected with 2019 novel  
334 coronavirus in Wuhan, China. *Lancet*.  
335 Li R, Pei S, Chen B, Song Y, Zhang T, Yang W, Shaman J (2020) Substantial  
336 undocumented infection facilitates the rapid dissemination of novel coronavirus  
337 (SARS-CoV2). *Science*.  
338 Wang H, Wang Z, Dong Y, Chang R, Xu C, Yu X, Zhang S, Tsamlag L, Shang M,  
339 Huang J, Wang Y, Xu G, Shen T, Zhang X, Cai Y (2020) Phase-adjusted estimation of  
340 the number of Coronavirus Disease 2019 cases in Wuhan, China. *Cell Discov* 6:10.  
341 H. Tian et al., *Science* 10.1126/science.abb6105 (2020).  
342 Azman AS, Luquero FJ (2020) From China: hope and lessons for COVID-19 control.  
343 *Lancet Infect Dis*.  
344  
345  
346  
347

348

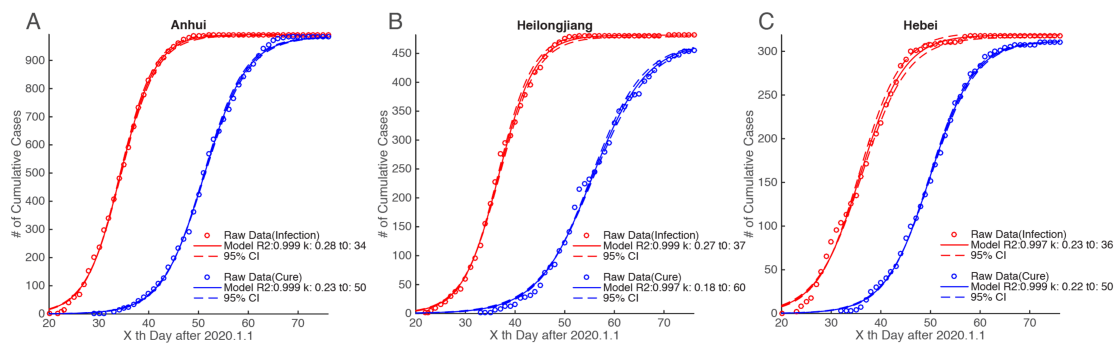

349

350 Figure 1 Example of provinces for the time series of infected and recovered cases  
 351 with corresponding fitted curve in mainland China

352 A-C show cases in three provinces (Anhui, Heilongjiang and Hebei). The horizontal axis in each panel  
 353 denotes the  $x^{\text{th}}$  day after January 1, 2020. The vertical axis in each panel is the cumulative number of  
 354 infected (red circles) and recovered cases (blue circles). The red and blue line are the fitting curves of  
 355 the sigmoid model, and the dashed red and blue curves mark the 95% confidence interval of the fitting  
 356 curves.

357

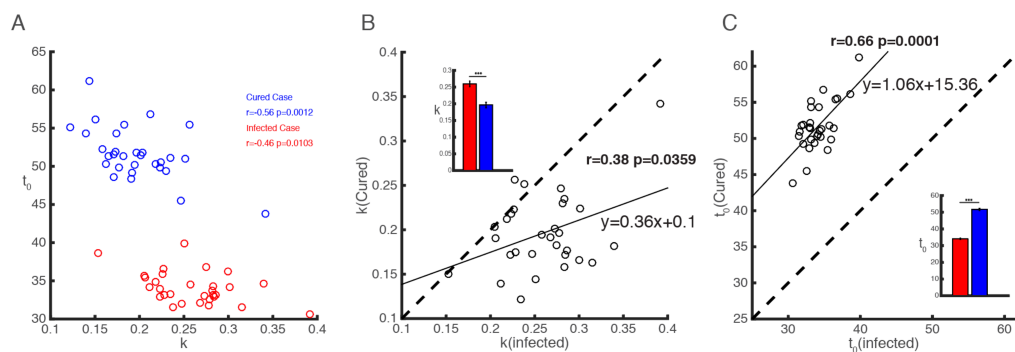

358

359 Figure 2 Relationship between the rules for infected and recovered cases in mainland  
 360 China

361 Panel A shows the scatter plot of the logistic growth rate ( $k$ ) and the semi-saturation period ( $t_0$ ) for  
 362 infected (red circles) and recovered cases (blue circles).

363 Panel B is the scatter plot of the logistic growth rate ( $k$ ) of infected and recovered cases (black circles),  
 364 the dashed line is the diagonal line of the coordinate system (the same for Panel C). The relation  
 365 between the logistic growth rates of infected and recovered cases is modeled with a linear function,  
 366 which is shown as the black line. The bar graph in the northwest corner shows the difference between  $k$   
 367 for infected and for recovered cases.

368 Panel C shows the scatter plot of the semi-saturation periods ( $t_0$ ). The black curve is the linear function  
 369 estimated based on the relation between infected and recovered recovered. The bar graph in the  
 370 southeast corner shows the difference between  $t_0$  for infected and recovered cases.

371

372

373

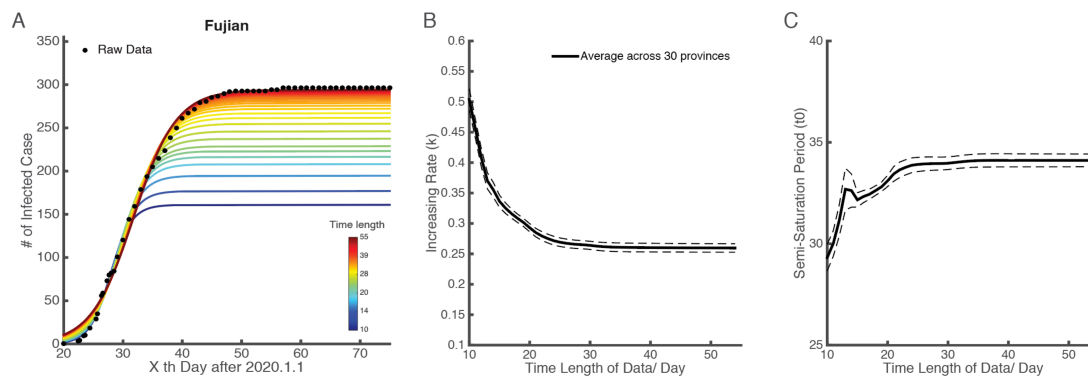

374

375 **Figure 3 Time stability of the logistic model for infected cases in mainland China**

376 Panel A shows the example of Fujian province. As in panels B and C, the horizontal axis denotes the  $x$   
377 th day after January 1, 2020. The vertical axis in panel A indicates the cumulative number of infected  
378 (black dots). The lines with different colors are the fitting curve by the logistic model using data with  
379 different time length as shown in color bar in the southeast corner.

380 Panels B and C illustrate how the estimated parameters ( $k$  and  $t_0$ ) change with increase time length of  
381 the available data. In panel B, the black curve shows the average logistic growth rate ( $k$ ) across 30  
382 provinces in mainland China, depending on the time length of data. The dashed lines mark the standard  
383 error. Panel C does the same for the semi-saturation period

384

385

386



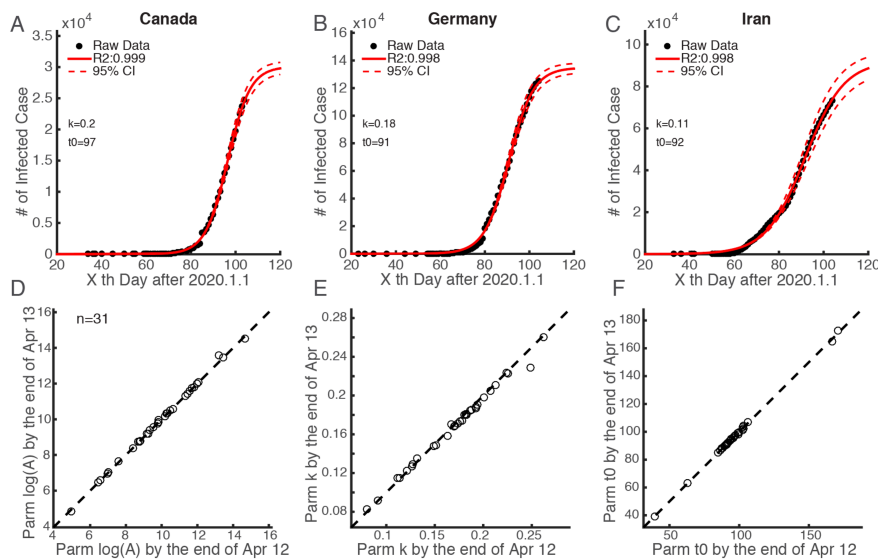

387

388 Figure 4 Example countries for the time series of infected cases with corresponding  
 389 fitted curves around the world and their temporal stability

390 Panel A-C show infected cases and their fitted curves for Canada, Germany and Iran. The horizontal  
 391 axis is the  $x^{\text{th}}$  day after Jan 1, 2020. The vertical axis indicates the number of infected cases in the  
 392 corresponding country. The black dots in each panel are raw data of the cumulative number of infected  
 393 cases. The red line is the fitted curves by our descriptive model. The dashed red lines mark the 95%  
 394 confidence interval of the fitted curves. Panel D-F show the difference of parameters estimated from  
 395 relative longer (by the end of Jun 13) and shorter (by the end of Apr 12) time series data, each dot  
 396 denotes for one country.

397

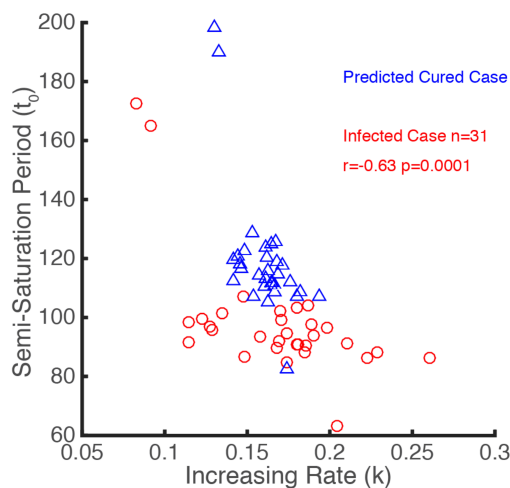

398

399 Figure 5 Prediction for growth rules of recovered cases around the world based on the  
 400 Chinese experience

401 The scatter plot of the logistic growth rates ( $k$ ) and the semi-saturation periods ( $t_0$ ) for infected cases is  
 402 shown in red circles. Based on the linear model shown in Fig 2BC, predictions of  $k$  and  $t_0$   
 403 for recovered cases are plotted as blue triangles.

404

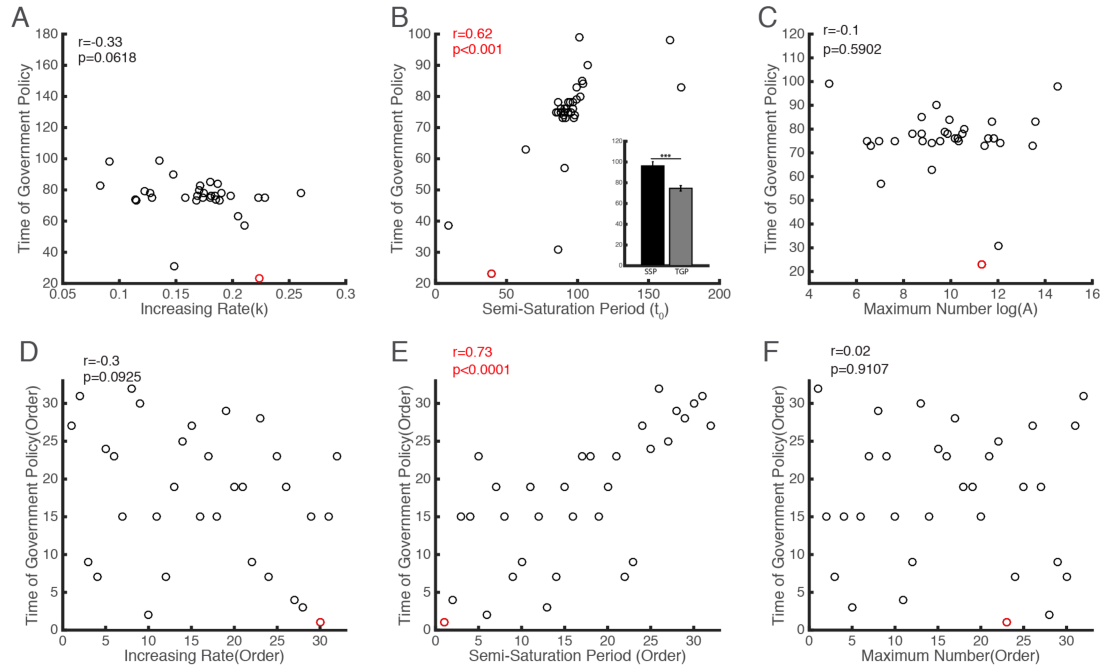

405

406 Figure 6 Relationship between the timing of government intervention and the model  
 407 parameters of infected case for each country

408 Panel A-C show the scatter plot of the time of government measures and the model  
 409 parameters of infected case ( $k$ ,  $t_0$  and  $A$ , respectively). In the southeast corner of Panel  
 410 B, a bar graph was shown to indicate the difference between timing of government  
 411 measures (grey bar) and semi-saturation period (SAP, black bar).

412 D-F shows the same data of A-C but in the order form.

413 The red circle in six panels denotes the model parameters in China's infected case.

414

415

416

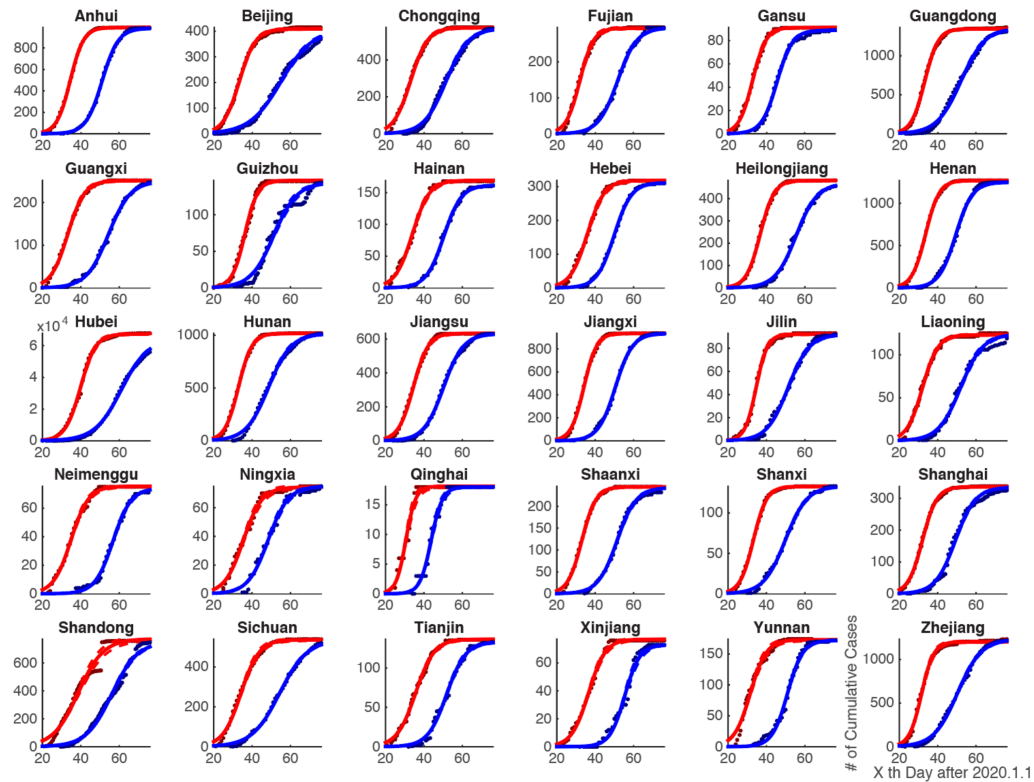

417

418 **Supplementary Figure S1 Intrinsic growth rules of patients infected with 2019**  
419 **novel coronavirus in all provinces of mainland China**

420 The deep red and blue dots in each panel are raw data of the cumulative infected and  
421 recovered cases. The red and blue lines represent the curves fitted by our descriptive  
422 model.

423

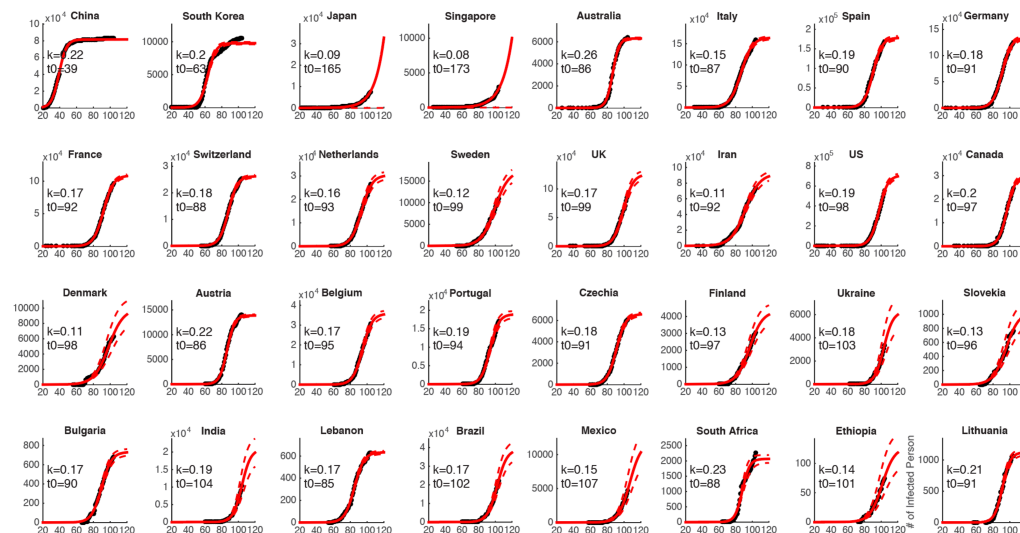

424

425 **Supplementary Figure S2 Intrinsic growth rules of patients infected with 2019**  
426 **novel coronavirus in 31 countries around the world**

427 The black dots in each panel represent the raw data of the cumulative infected cases.

428 The red line is the curve fitted by our descriptive model.

429

430

431
